# Supplementary material for: Catalytic SrMoO4 nanoparticles and conducting polymer composite sensor for monitoring of K+-induced dopamine release from neuronal cells
Source: Royal Society of Chemistry journal article supplement (doi:10.1039/d1tb02295d), 2022-01-01
Supplement: d1tb02295d1.pdf [file d1tb02295d1.pdf]

## Supporting Information

### Catalytic SrMoO<sub>4</sub> nanoparticles and conducting polymer composite sensor for monitoring of K<sup>+</sup>-induced dopamine release from neuronal cells

Khatun A Jannath <sup>†a</sup>, Mahmood Hassan Akhtar <sup>†abd</sup>, N.G. Gurudatt<sup>a,b,e</sup>, Deog-Su Park <sup>a</sup>, Kwang-Bok Kim<sup>c\*</sup>,  
and Yoon-Bo Shim<sup>a,b\*</sup>

<sup>a</sup> Institute of BioPhysio Sensor Technology (IBST), Pusan National University, Busan 46241, Republic of Korea

<sup>b</sup> Department of Chemistry, Pusan National University, Busan 46241, Republic of Korea

<sup>c</sup> Digital Health Care R&D Department, Korea Institute of Industrial Technology (KITECH), Cheonan 31056, Republic of Korea

<sup>d</sup> Present address: National University of Technology, Islamabad, Pakistan

<sup>e</sup> Present address: Department of Mechanical Engineering, Yonsei University, Republic of Korea.

[\*] Corresponding author: **Prof. Yoon-Bo Shim, Dr. Kwang-Bok Kim**

E-mail : [ybshim@pusan.ac.kr](mailto:ybshim@pusan.ac.kr), [kb815kim@kitech.re.kr](mailto:kb815kim@kitech.re.kr)

Tel.: +82-51-510-2244; Fax: +82-51-514-2122.

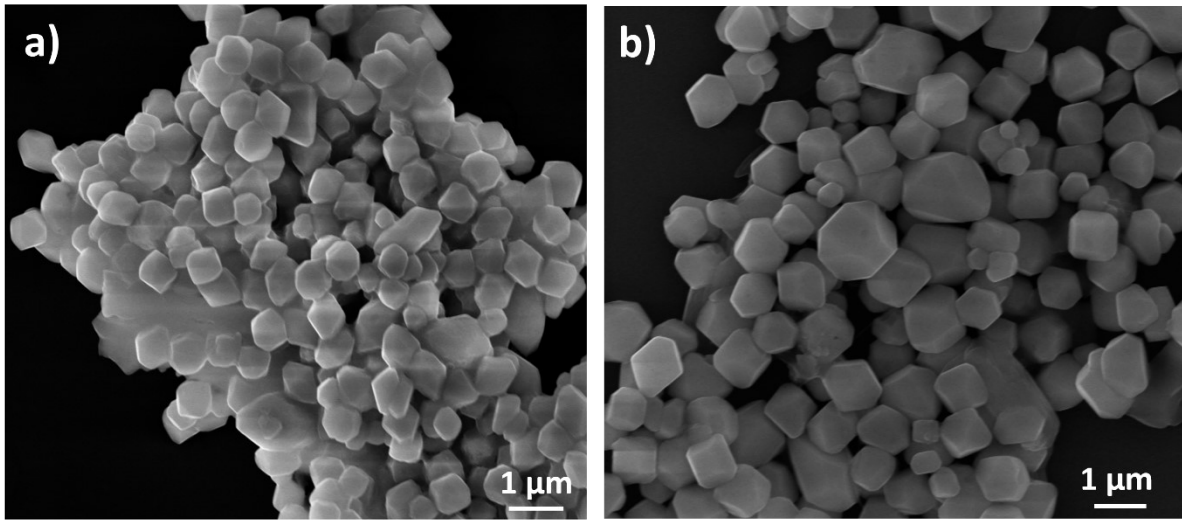

**Figure S1:** FE-SEM images of SrMoO<sub>4</sub> nanoparticles when treated with different time and temperature (a) 8 hr and 140 °C, (b) 10 hr and 170 °C.

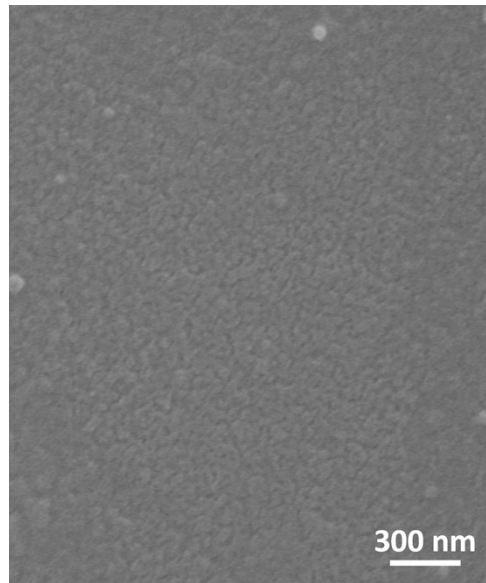

**Figure S2:** SEM image of pTBA at GC electrode

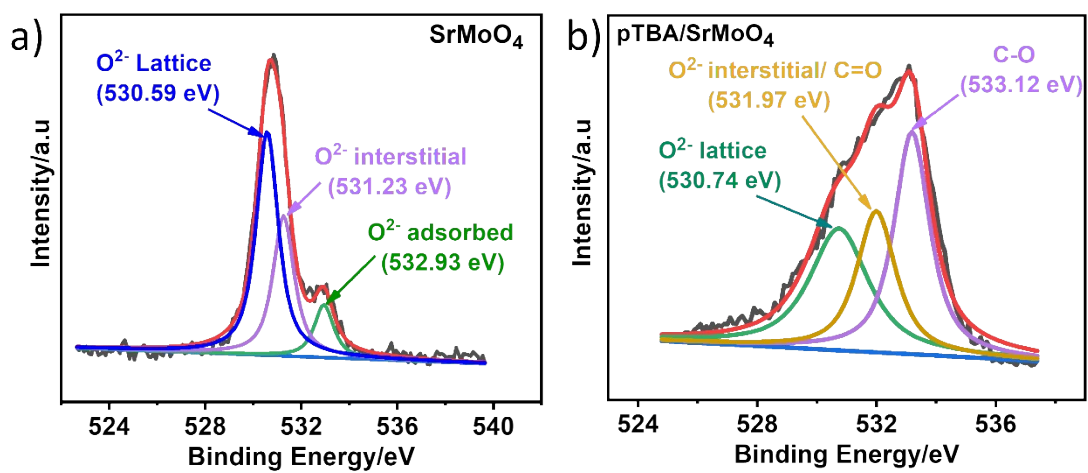

Figure S3: The deconvoluted O 1s spectrum of a) SrMoO<sub>4</sub> and b) pTBA/SrMoO<sub>4</sub>.

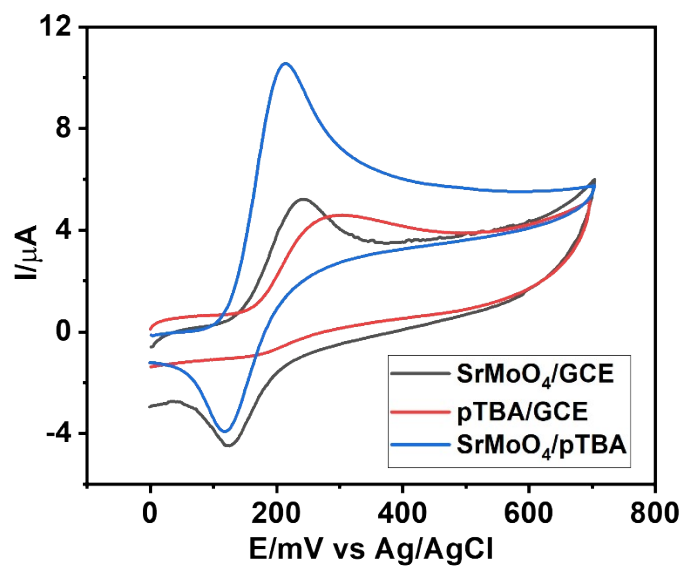

Figure S4: CV responses of pTBA, SrMoO<sub>4</sub> and pTBA/SrMoO<sub>4</sub>/Nf electrodes in 0.1 M PBS (pH 7.4) containing 200 μM DA.

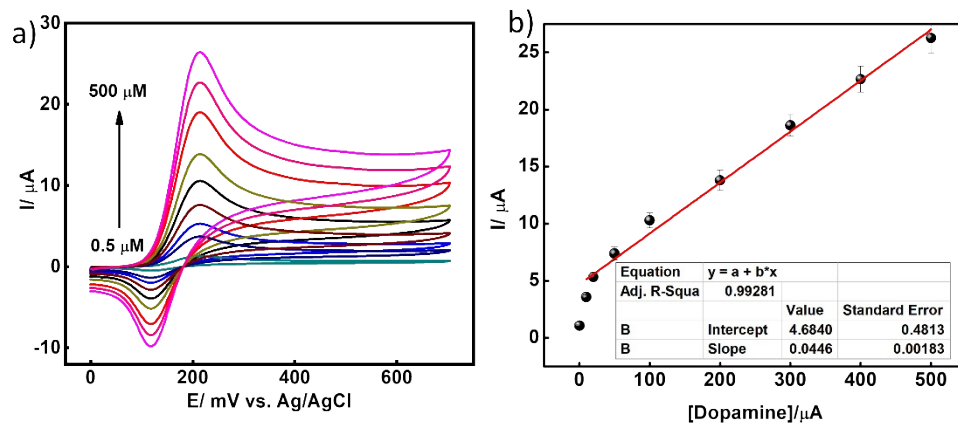

**Figure S5:** a) pTBA/SrMoO<sub>4</sub>/Nf sensor response to the different concentrations of DA from 0.5 to 500 μM and (b) the corresponding calibration plot.

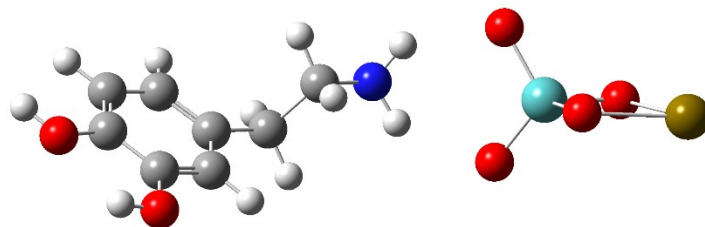

**Figure S6:** Optimized structure of DA and part of SrMoO<sub>4</sub> obtained by DFT calculation.

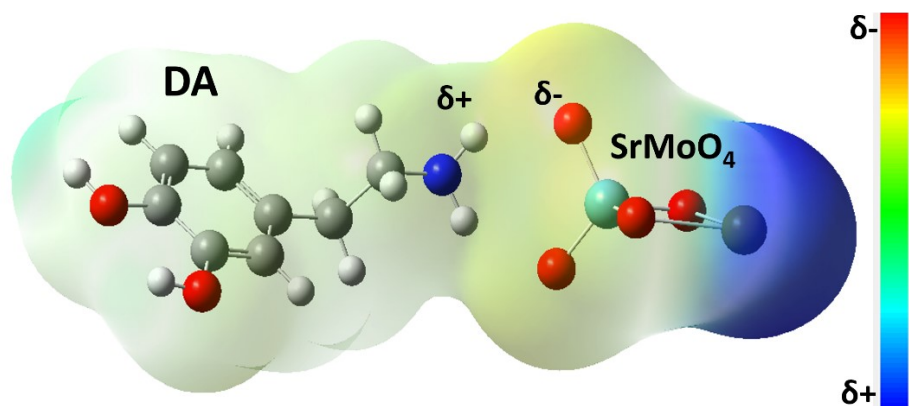

Figure S7: Molecular electrostatic potential (MEP) analysis of DA and part of SrMoO<sub>4</sub>.

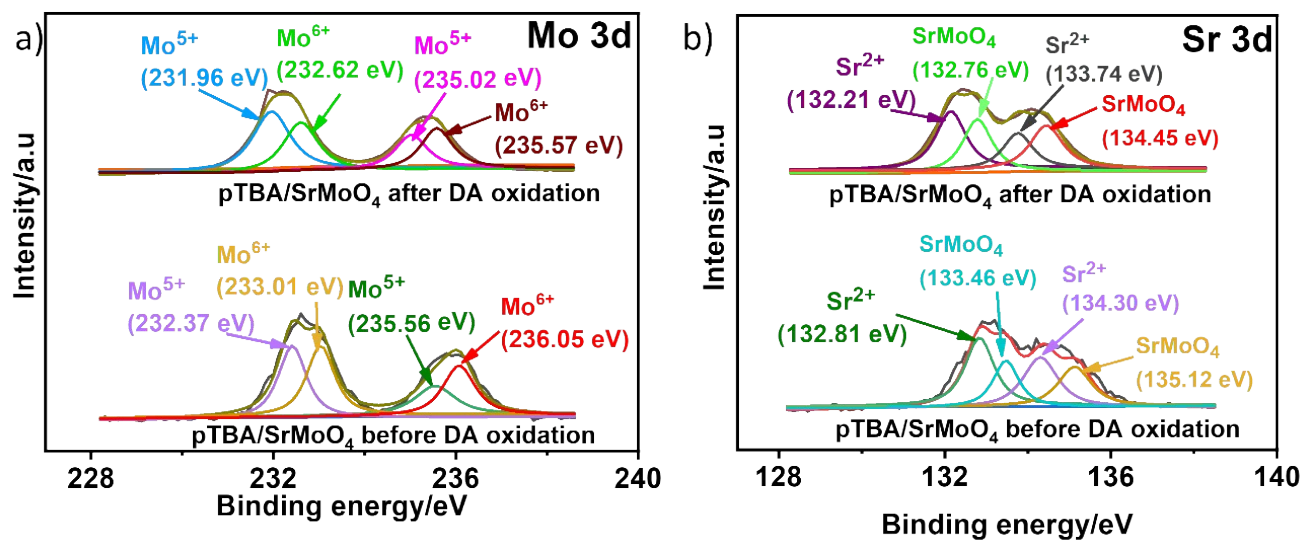

Figure S8: High resolution XPS spectrum of a) Mo 3d and b) Sr 3d before and after DA oxidation at pTBA/SrMoO<sub>4</sub>/Nf electrode.

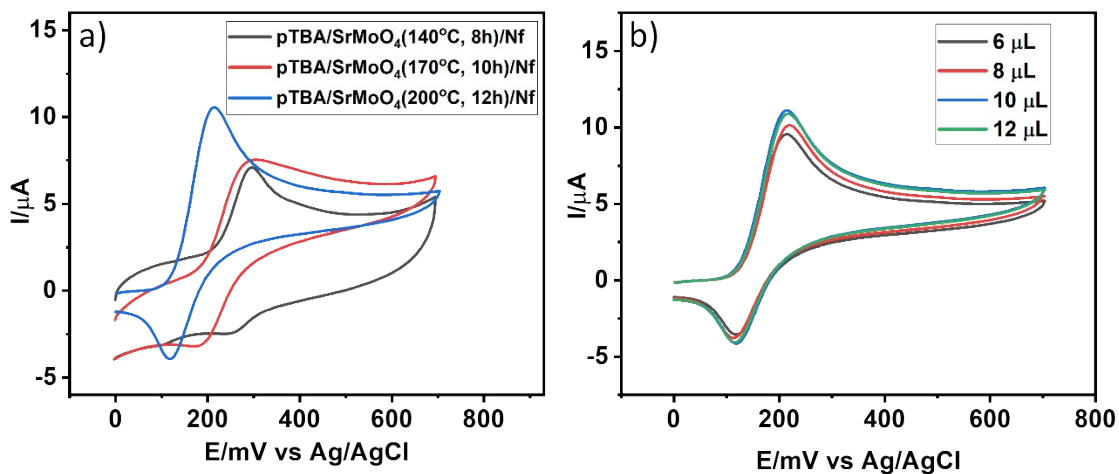

**Figure S9:** a) CV responses of pTBA/SrMoO<sub>4</sub>/Nf electrodes in 0.1M PBS containing 200 μM DA with SrMoO<sub>4</sub> NPs synthesized at various temperature and time. b) CV responses of pTBA/SrMoO<sub>4</sub>/Nf electrode with different SrMoO<sub>4</sub> loading.

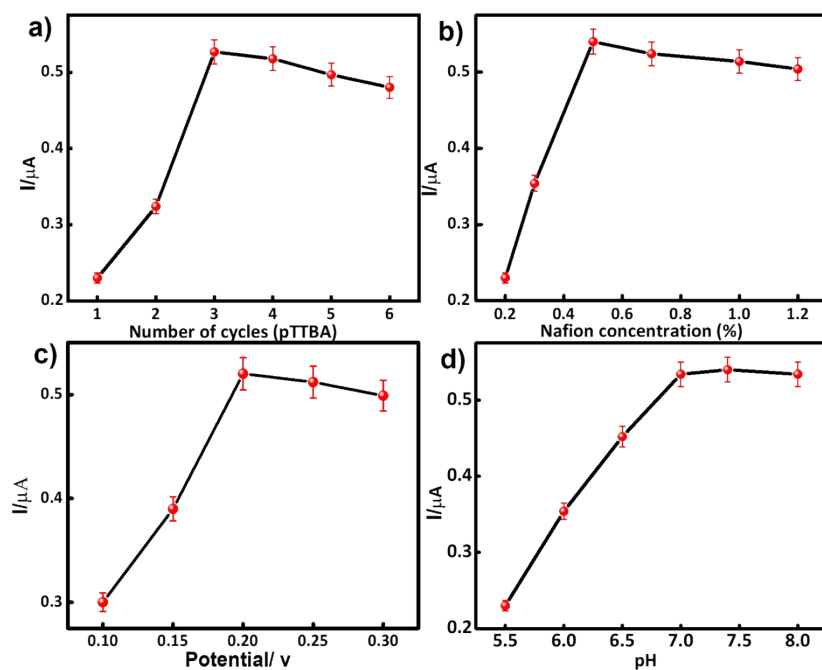

**Figure S10:** Optimization of the experimental conditions for the DA sensor: (a) No. of pTBA cycles (b) nafion concentrations (c) effect of potential change on the sensor performance, and (d) optimum pH value for PBS buffer solution.

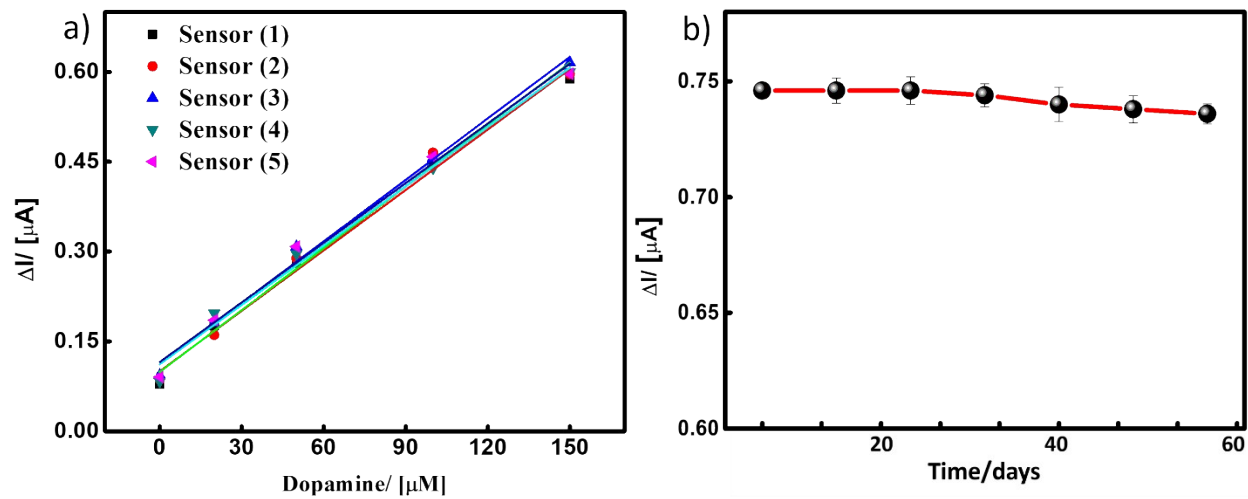

**Figure S11:** (a) Reproducibility of the proposed sensor containing different DA concentrations (0.5 to 150  $\mu\text{M}$ ) in 0.1 M PBS (pH 7.4). (b) Stability of the prepared sensor containing 200  $\mu\text{M}$  DA in 0.1 M PBS (pH 7.4) for 55 days.
